# Supplementary material for: Biocompatible Silver Nanoparticles: Study of the Chemical and Molecular Structure, and the Ability to Interact with Cadmium and Arsenic in Water and Biological Properties
Source: MDPI journal article supplement (doi:10.3390/nano11102540), 2021-09-28
Supplement: s1 [file s1]

*Supplementary*

# **Biocompatible Silver Nanoparticles: Study of the Chemical and Molecular Structure, and the Ability to Interact with Cadmium and Arsenic in Water and Biological Properties**

**Federica Bertelà<sup>1</sup>, Martina Marsotto<sup>1</sup>, Cecilia Meneghini<sup>2</sup>, Luca Burratti<sup>3</sup>, Valentin-Adrian Maraloiu<sup>4</sup>,  
Giovanna Iucci<sup>1</sup>, Iole Venditti<sup>1</sup>, Paolo Proposito<sup>3</sup>, Veronica D'Ezio<sup>1</sup>, Tiziana Persichini<sup>1</sup>  
and Chiara Battocchio<sup>1,\*</sup>**

<sup>1</sup> Department of Sciences, Roma Tre University of Rome, Via della Vasca Navale 79, 00146 Rome, Italy; fed.bertela@stud.uniroma3.it (F.B.); martina.marsotto@uniroma3.it (M.M.); giovanna.iucci@uniroma3.it (G.I.); iole.venditti@uniroma3.it (I.V.); veronica.dezio@uniroma3.it (V.D.); tiziana.persichini@uniroma3.it (T.P)

<sup>2</sup> Department of Chemistry, Sapienza University of Rome, P.le A. Moro 5, 00185 Rome, Italy; meneghini.1716330@studenti.uniroma1.it

<sup>3</sup> Department of Industrial Engineering and INSTM, University of Rome Tor Vergata, via del Politecnico 1, 00133, Rome, Italy; luca.burratti@uniroma2.it (L.B.); paolo.proposito@uniroma2.it (P.P.)

<sup>4</sup> National Institute of Materials Physics, 405A Atomistilor St., 077125 Magurele, Romania; maraloiu@infim.ro

\* Correspondence: chiara.battocchio@uniroma3.it

**Table S1.** XPS data for AgNPs/L-cys/citr exposed to Cd(II) and As(III): BE (eV), FWHM (eV) and proposed signals assignments.

| Sample                      | Signal              | BE (eV) | FWHM (eV) | Assignment                     |
|-----------------------------|---------------------|---------|-----------|--------------------------------|
| AgNPs/L-cys/citr /<br>As10  | C1s                 | 285.00  | 1.36      | C-C                            |
|                             |                     | 286.55  | 1.36      | C-S; C-N                       |
|                             |                     | 288.16  | 1.36      | C-OH                           |
|                             |                     | 289.22  | 1.36      | COOH                           |
|                             |                     | 290.81  | 1.36      | COO <sup>-</sup>               |
|                             | N1s                 | 400.00  | 1.78      | R-NH <sub>2</sub>              |
|                             |                     | 401.35  | 1.78      | R-NH <sub>3</sub> <sup>+</sup> |
|                             | O1s                 | 531.49  | 1.82      | C=O                            |
|                             |                     | 532.58  | 1.82      | C-O                            |
|                             |                     | 534.38  | 1.82      | H <sub>2</sub> O               |
|                             | S2p <sub>3/2</sub>  | 160.23  | 0.83      | -S-Ag (sp)                     |
|                             |                     | 161.43  | 0.83      | -S-Ag (sp <sup>3</sup> )       |
|                             |                     | 163.21  | 0.83      | -SH physisorbed                |
|                             |                     | 162.22  | 0.83      | S-S                            |
|                             |                     | 168.24  | 0.83      | oxidized S                     |
|                             | Ag3d <sub>5/2</sub> | 368.09  | 0.95      | Ag (0)                         |
|                             |                     | 368.51  | 0.95      | Ag <sup>+</sup>                |
|                             | As3d <sub>5/2</sub> | 45.00   | 1.50      | As <sup>+3</sup>               |
|                             |                     | 45.98   | 1.50      | As <sup>+5</sup>               |
| AgNPs/L-cys/citr /<br>Cd 10 | C1s                 | 285.00  | 1.35      | C-C                            |
|                             |                     | 286.48  | 1.35      | C-S; C-N                       |
|                             |                     | 288.25  | 1.35      | C-OH                           |
|                             |                     | 289.60  | 1.35      | COOH                           |
|                             | N1s                 | 399.47  | 1.22      | R-NH <sub>2</sub>              |
|                             |                     | 400.59  | 1.22      | R-NH <sub>3</sub> <sup>+</sup> |
|                             | O1s                 | 531.49  | 1.81      | C=O                            |
|                             |                     | 532.50  | 1.81      | C-O                            |
|                             |                     | 533.95  | 1.81      | H <sub>2</sub> O               |
|                             | S2p <sub>3/2</sub>  | 160.99  | 1.26      | S-Ag (sp)                      |
|                             |                     | 161.90  | 1.26      | S-Ag (sp <sup>3</sup> )        |
|                             |                     | 163.36  | 1.26      | SH physisorbed                 |
|                             |                     | 168.46  | 1.26      | oxidized S                     |
|                             | Ag3d <sub>5/2</sub> | 367.95  | 1.05      | Ag (0)                         |
|                             |                     | 368.74  | 1.05      | Ag <sup>+</sup>                |
|                             | Cd3d <sub>5/2</sub> | 405.33  | 1.44      | Cd <sup>2+</sup>               |

**Table S2.** Peak position in wavenumbers (cm<sup>-1</sup>) and related peak assignment for samples As10 and Cd10, treated with 10 ppm solutions of As(III) and Cd(II) ions, respectively, and for the reference untreated sample AgNPs. The peaks are labelled as strong (s), medium (m), weak (w) or shoulder (sh).

| Wavenumber (cm <sup>-1</sup> ) | Assignment                                                     | As10 | Cd10 | AgNPs |
|--------------------------------|----------------------------------------------------------------|------|------|-------|
| 3360-3340                      | O-H stretching                                                 | s    | s    |       |
| 2940-2920; 2850                | C-H stretching                                                 | w    | w    | w     |
| 1724                           | C=O stretching carboxylic acid                                 | s    | s    |       |
| 1575-1580                      | carboxylate CO <sub>2</sub> <sup>-</sup> asymmetric stretching | s    | s    | s     |
| 1390                           | carboxylate CO <sub>2</sub> <sup>-</sup> asymmetric stretching | s    | s    | sh    |

|         |                                      |    |    |   |
|---------|--------------------------------------|----|----|---|
| 1352    | C-H bending                          | sh | sh | s |
| 1260    | Citrate skeletal vibration           | s  | s  |   |
| 1190    | Citrate skeletal vibration           | w  | w  |   |
| 1146    | Citrate skeletal vibration           | w  | w  |   |
| 1074    | Citrate skeletal vibration           | w  | w  |   |
| 835     | CO <sub>2</sub> <sup>-</sup> bending | w  | w  | m |
| 750-740 |                                      | w  | w  | m |
| 640     | C-S stretching                       | w  | m  | s |

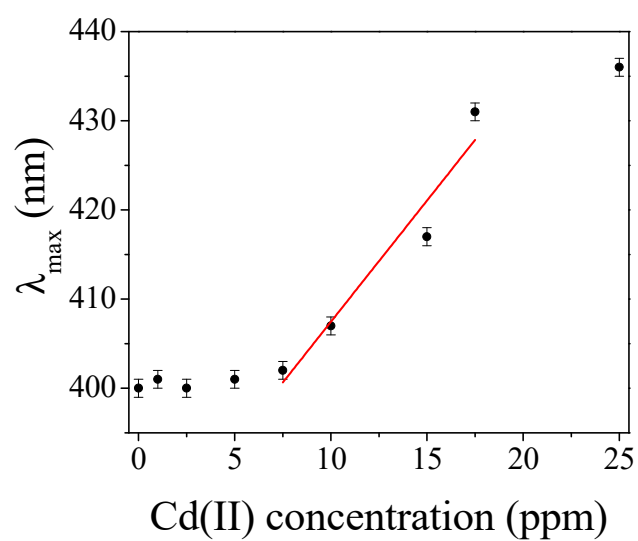

**Figure S1.** The maximum of the absorption band of AgNPs as a function of Cd(II) concentration in ppm. The red line represents a linear fit in the range from 7.5 to 17.5 ppm.

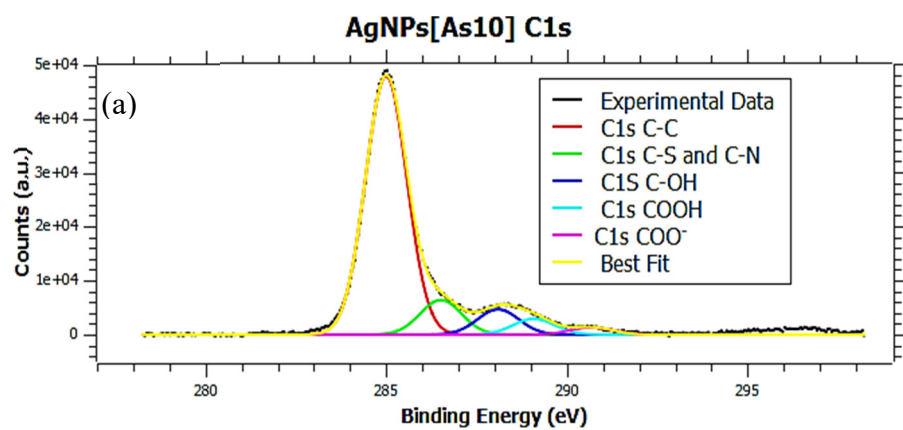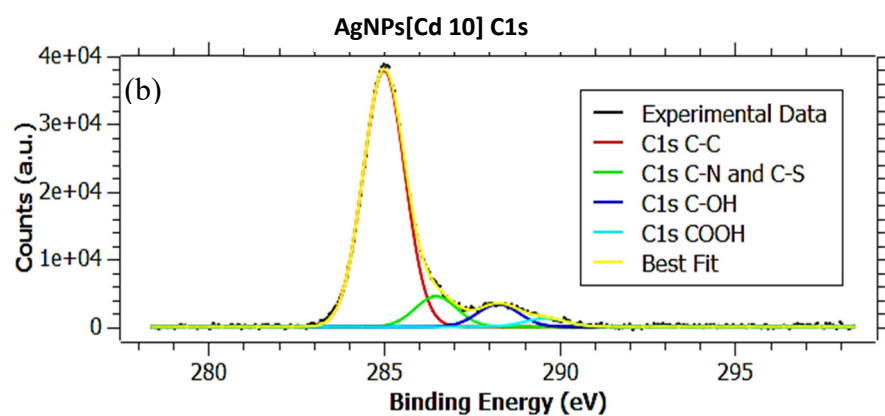

C1s

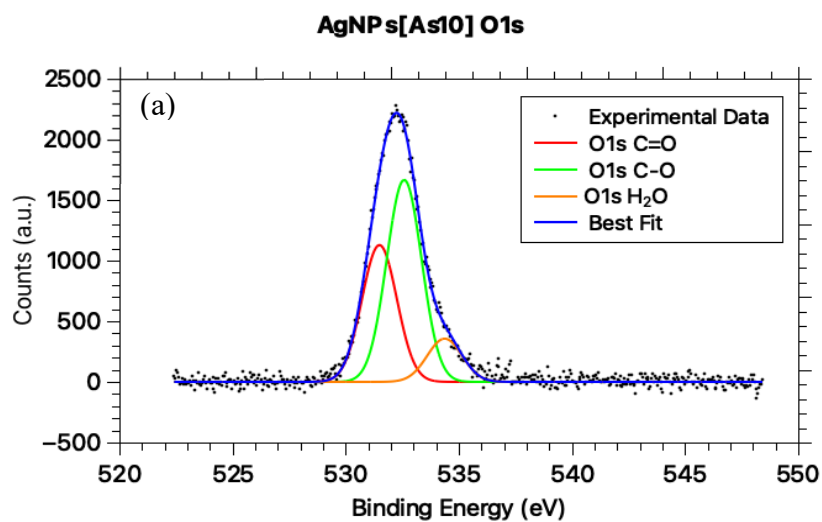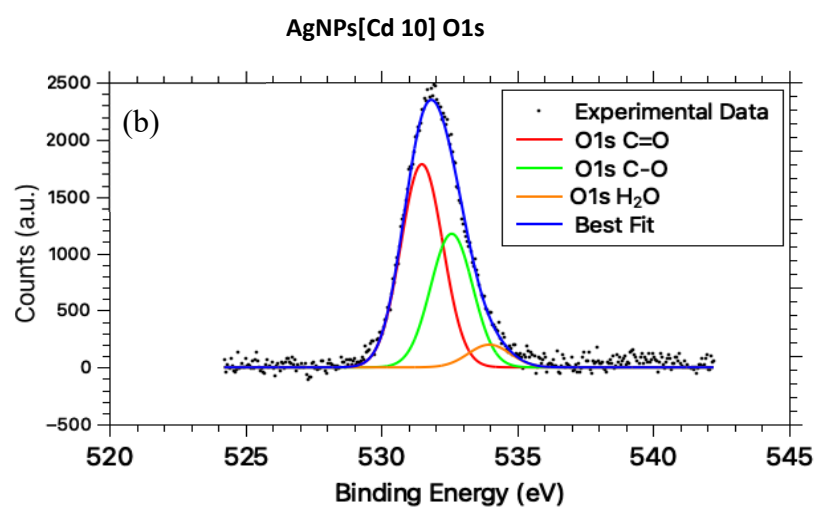

O1s

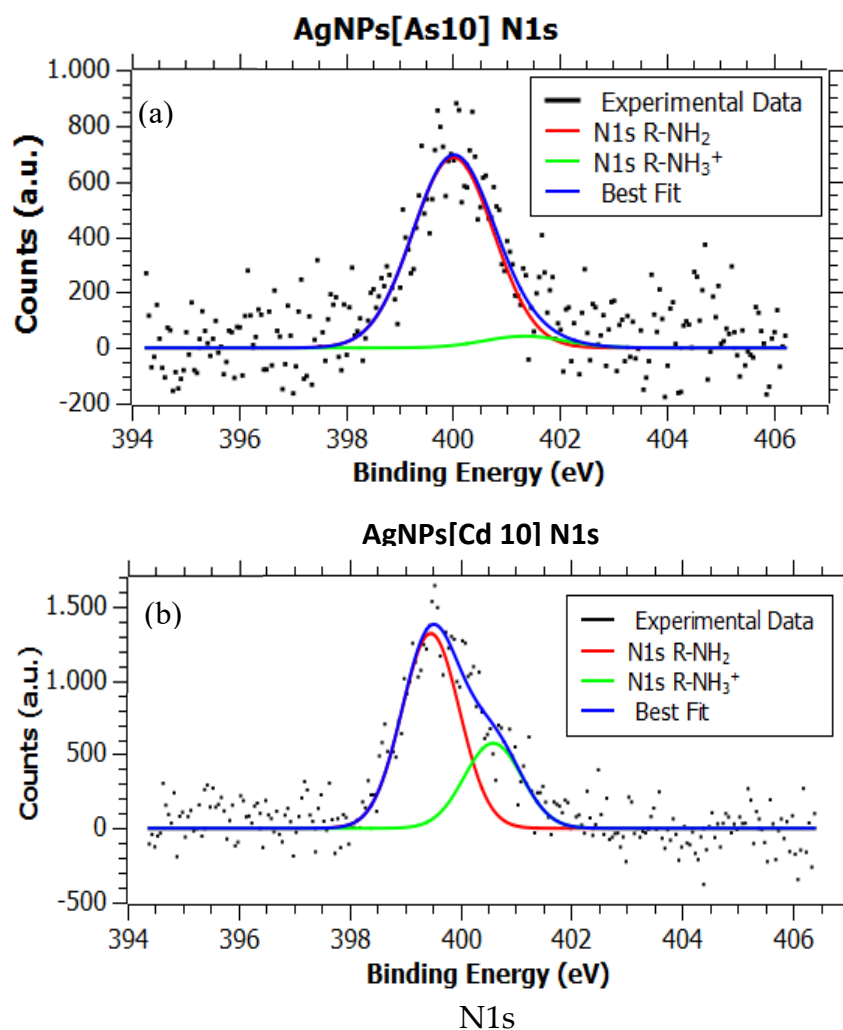

**Figure S2.** XPS spectra collected at C1s, O1s and N1s core levels.

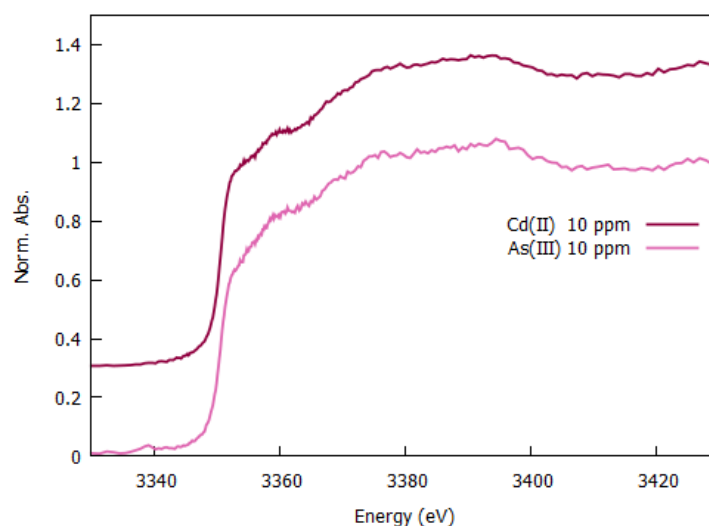

**Figure S3.** The Ag-L<sub>3</sub> edge XANES spectra measured on Ag(III) 10 ppm and Cd(II) 10 ppm samples (vertically shifted for clarity) confirms the silver mainly in metallic state according to the literature data [1]. The effect of Ag-S coordination at the NP surface is negligible due to the relatively large NP core sizes giving to small surface to volume ratios.

1 Liu, S.H.; Tsai, H.M.; Pao, C.W.; Chiou, J. W.; Ling, D.C.; Pong, W.F.; Tsai, M.-H.; Lin, H.J.; Jang, L.Y.; Lee, J.F.; et al. Electronic and magnetic properties of the Ag-doped Fe<sub>3</sub>O<sub>4</sub> films studied by x-ray absorption spectroscopy. *Appl. Phys. Lett.* **2006**, *89*, 092112.
